# Supplementary material
Source: PubMed Central journal article supplement (PMC4123403)
Supplement: CJN.11111113_CJN11111113SupplementaryData.pdf [file CJN.11111113_CJN11111113SupplementaryData.pdf]

Supplemental Table 1. Patients [N (%)] treated with concomitant<sup>a</sup> and additional<sup>b</sup> antihypertensive medications during the base phase of the study

|                                               | Low dose<br>0.1 mg/kg/day<br>(N=33) |            | Medium dose<br>0.3 mg/kg/day<br>(N=34) |            | High dose<br>0.7 mg/kg/day<br>(N=34) |            | Total<br>(N=101) <sup>d</sup> |            |
|-----------------------------------------------|-------------------------------------|------------|----------------------------------------|------------|--------------------------------------|------------|-------------------------------|------------|
|                                               | Concomitant                         | Additional | Concomitant                            | Additional | Concomitant                          | Additional | Concomitant                   | Additional |
| Antihypertensive Agent <sup>c</sup>           | 9 (27.3)                            | 2 (6.1)    | 8 (23.5)                               | 3 (8.8)    | 10 (29.4)                            | 5(14.7)    | 27 (26.7)                     | 10 (9.9)   |
| Agents acting on the renin-angiotensin system | 4 (12.1)                            | 0 (0.0)    | 4 (11.8)                               | 0 (0.0)    | 7 (20.6)                             | 3 (8.8)    | 15 (14.9)                     | 3 (3.0)    |
| Calcium channel blockers                      | 4 (12.1)                            | 1 (3.0)    | 5 (14.7)                               | 2 (5.9)    | 2 (5.9)                              | 4 (11.8)   | 11 (10.9)                     | 7 (6.9)    |
| Beta blocking agents                          | 2 (6.1)                             | 0 (0.0)    | 4 (11.8)                               | 1 (2.9)    | 2 (5.9)                              | 0          | 8 (7.9)                       | 1 (1.0)    |
| Diuretics                                     | 1 (3.0)                             | 2 (6.1)    | 2 (5.9)                                | 0 (0.0)    | 1 (2.9)                              | 0 (0.0)    | 4 (4.0)                       | 2 (2.0)    |
| Other antihypertensive agents <sup>e</sup>    | 0 (0.0)                             | 0 (0.0)    | 2 (5.9)                                | 0 (0.0)    | 1 (2.9)                              | 0 (0.0)    | 3 (3.0)                       | 0 (0.0)    |

<sup>a</sup>Patients who continued their prior antihypertensive medication during the trial.

<sup>b</sup>Patients who initiated treatment with an additional antihypertensive medication during the trial.

<sup>c</sup>Every patient is counted once for each applicable medication. Patients who received multiple medications within a category are counted once for that category.

<sup>d</sup>Two randomized patients did not take study medication, and were excluded from the efficacy and safety analyses.

<sup>e</sup>Category includes the following classes: centrally-acting agents and alpha adrenergic blocking agents.
